# Supplementary material for: Pestalactams A–C: novel caprolactams from the endophytic fungus Pestalotiopsis sp.
Source: Royal Society of Chemistry journal article supplement (doi:10.1039/b924169h), 2010-01-01

# S1 Supplementary information contents page

**Title:** Pestalactams A-C: Novel caprolactams from the endophytic fungus *Pestalotiopsis* sp.

**Authors:** Rohan A. Davis,<sup>a,\*</sup> Anthony R. Carroll,<sup>a</sup> Katherine T. Andrews,<sup>b</sup> Glen M. Boyle,<sup>b</sup> Truc Linh Tran,<sup>b</sup> Peter C. Healy,<sup>a</sup> John A. Kalaitzis,<sup>c</sup> and Roger G. Shivas<sup>d</sup>

## Addresses:

<sup>a</sup>*Eskitis Institute, Griffith University, Brisbane, QLD 4111, Australia*

<sup>b</sup>*Queensland Institute for Medical Research, Herston, Queensland, Australia, 4006; Griffith Medical Research College, a joint program of Griffith University and QIMR, Herston, Queensland, Australia*

<sup>c</sup>*School of Biotechnology and Biomolecular Sciences, The University of New South Wales, Sydney, NSW 2052, Australia*

<sup>d</sup>*Queensland Primary Industries and Fisheries, Indooroopilly, QLD 4068, Australia*

## Corresponding author contact details:

Tel.: +61 7 3735 6000; Fax: +61 7 3735 6001; E-mail: r.davis@griffith.edu.au

## Contents:

- S2** <sup>1</sup>H NMR spectrum for pestalactam A (**1**) in DMSO-*d*<sub>6</sub>
- S3** <sup>13</sup>C NMR spectrum for pestalactam A (**1**) in DMSO-*d*<sub>6</sub>
- S4** <sup>1</sup>H NMR spectrum for pestalactam B (**2**) in DMSO-*d*<sub>6</sub>
- S5** <sup>13</sup>C NMR spectrum for pestalactam B (**2**) in DMSO-*d*<sub>6</sub>
- S6** <sup>1</sup>H NMR spectrum for pestalactam C (**3**) in DMSO-*d*<sub>6</sub>
- S7** <sup>13</sup>C NMR spectrum for pestalactam C (**3**) in DMSO-*d*<sub>6</sub>
- S8** Hydrogen bonding network in the crystal structure of pestalactam A (**1**)

# S2 $^1\text{H}$ NMR spectrum for pestalactam A (**1**) in $\text{DMSO-}d_6$

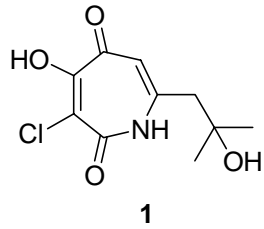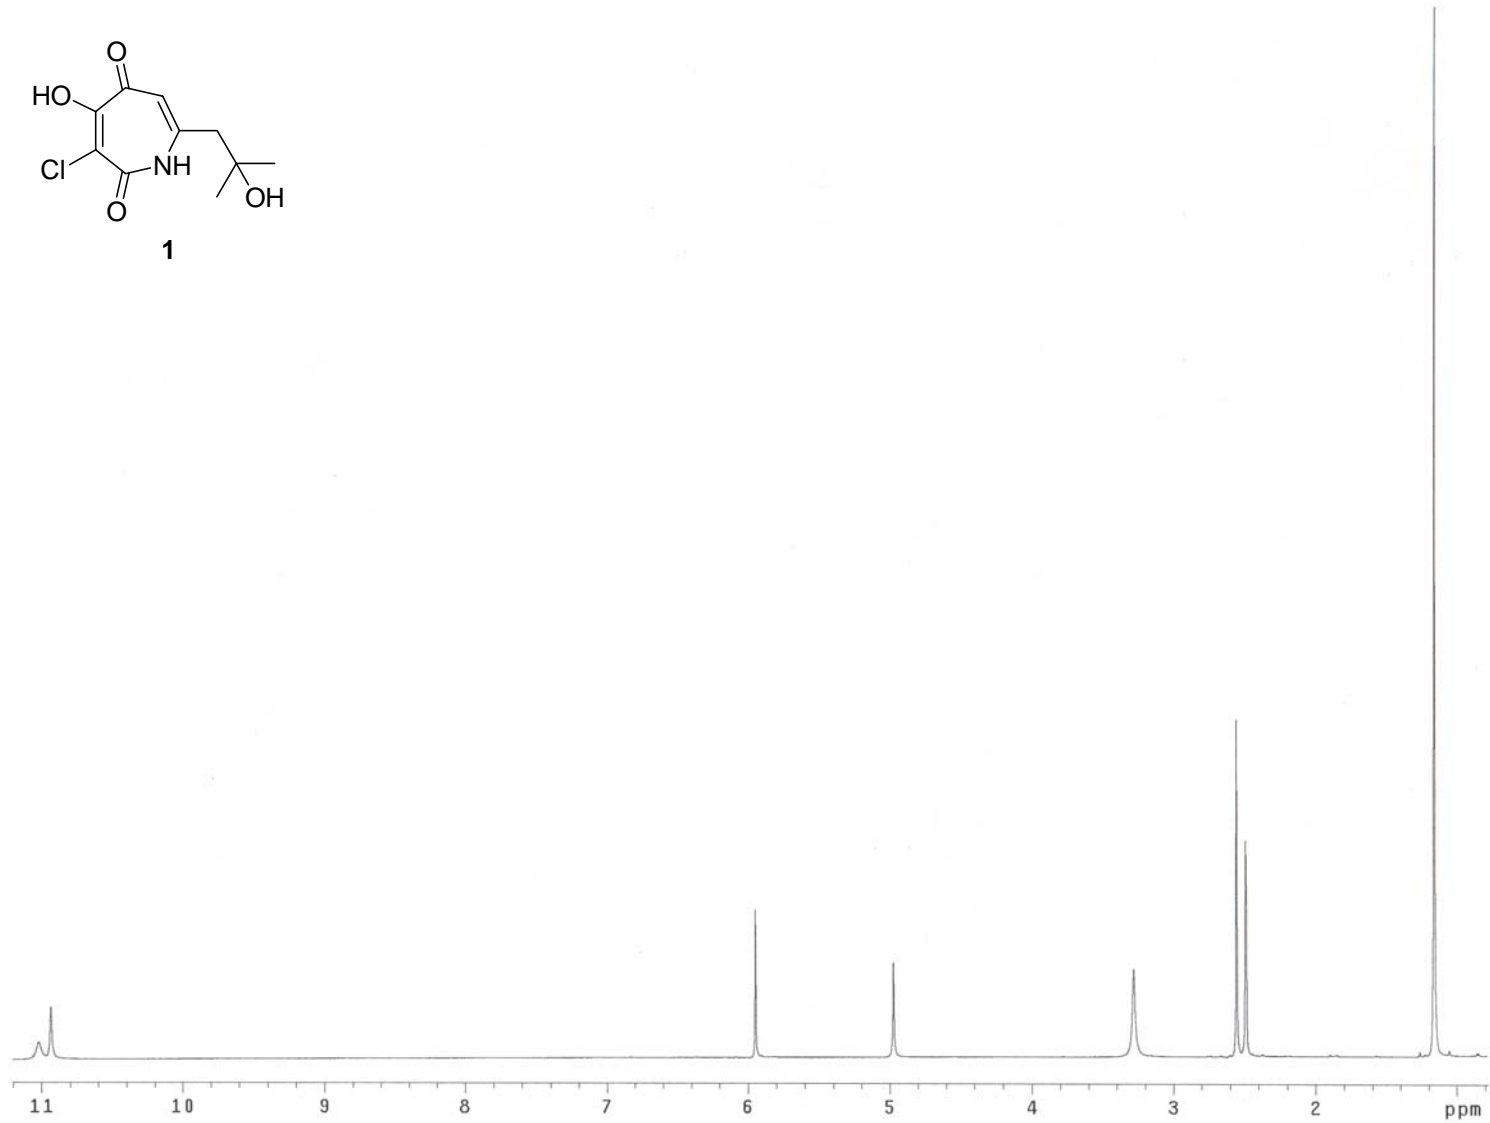

# S3 $^{13}\text{C}$ NMR spectrum for pestalactam A (**1**) in $\text{DMSO-}d_6$

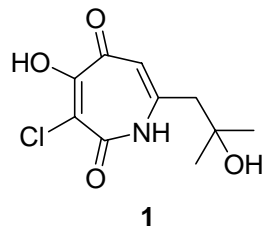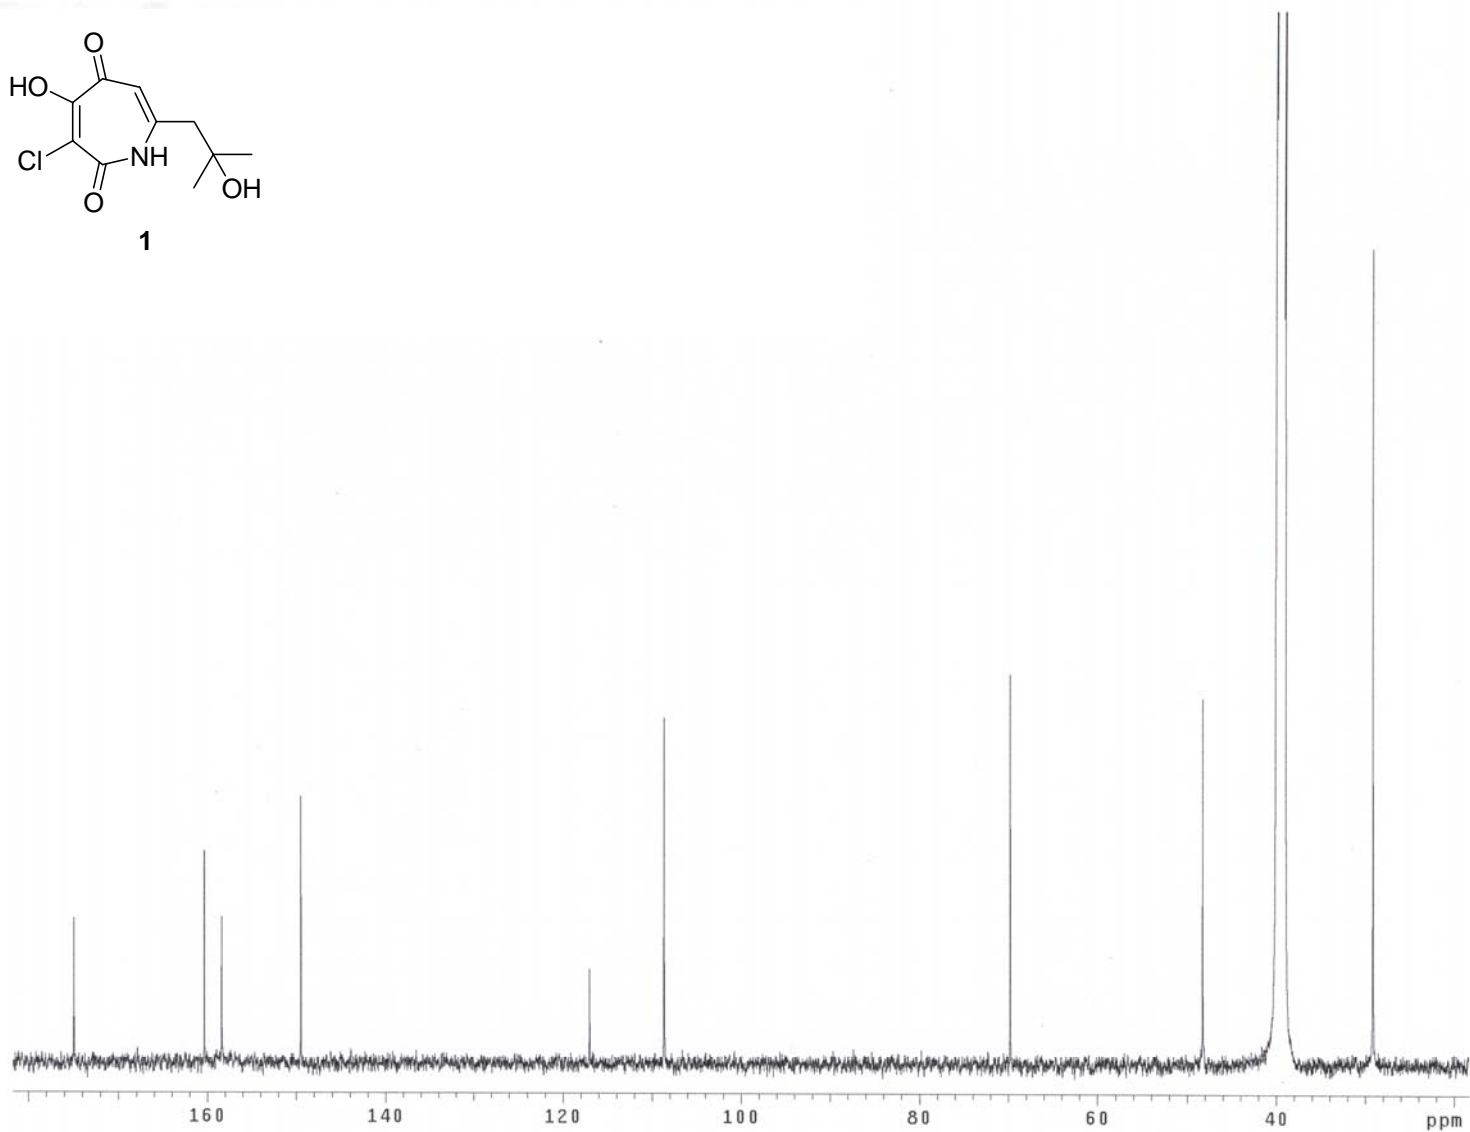

# S4 $^1\text{H}$ NMR spectrum for pestalactam B (**2**) in $\text{DMSO-}d_6$

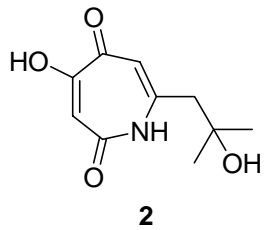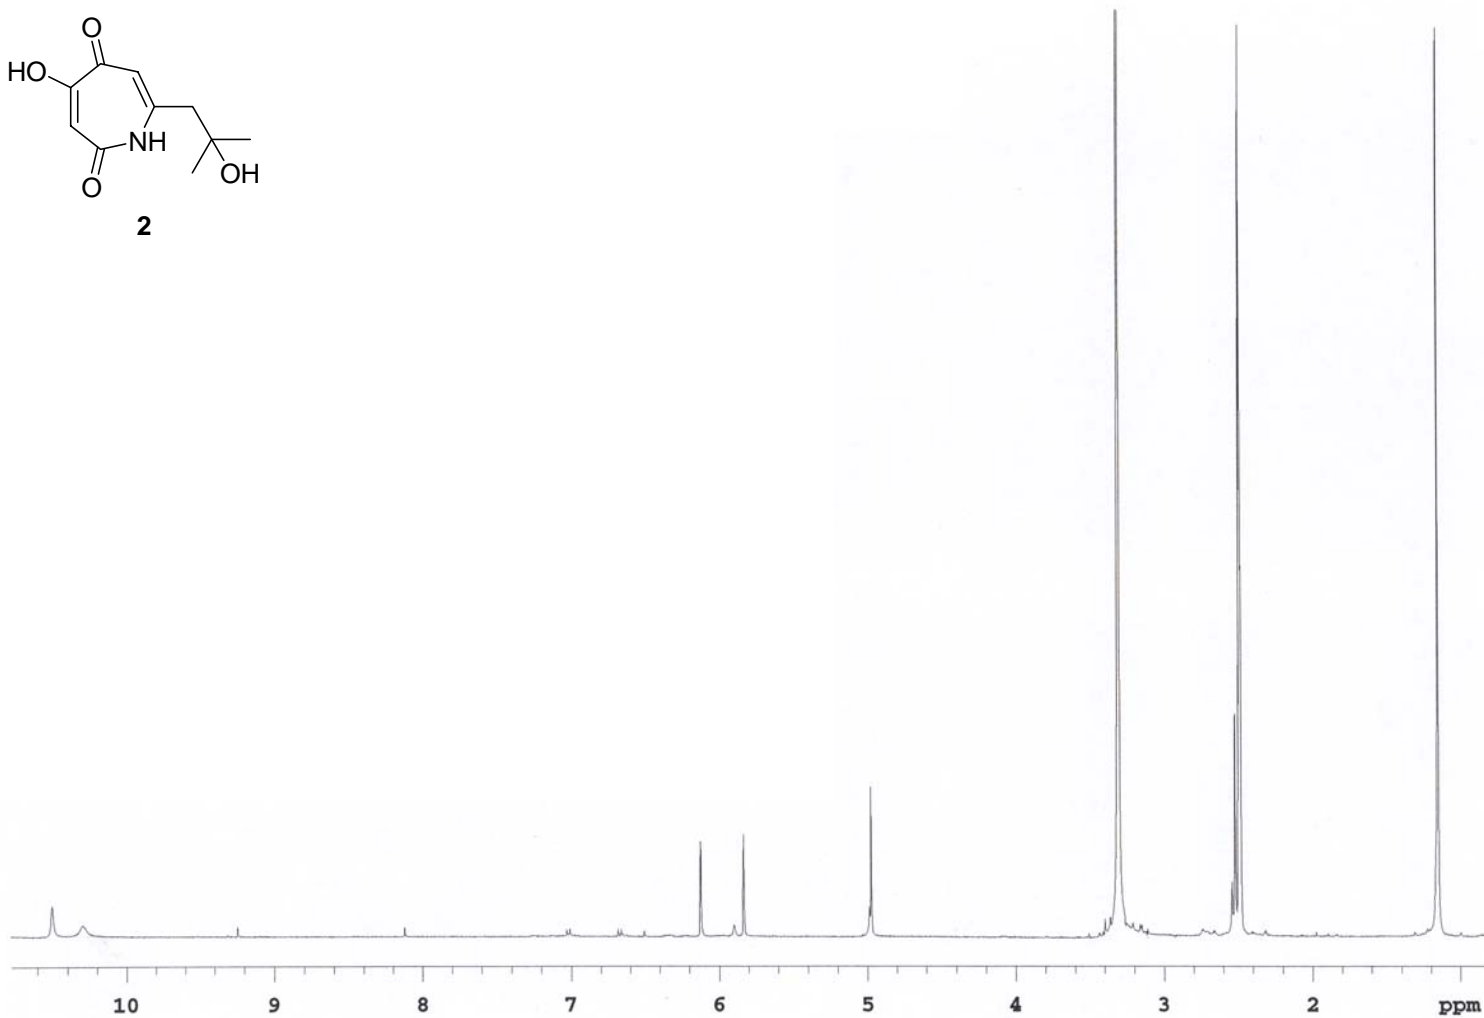

# S5 $^{13}\text{C}$ NMR spectrum for pestalactam B (**2**) in $\text{DMSO-}d_6$

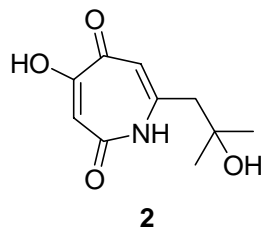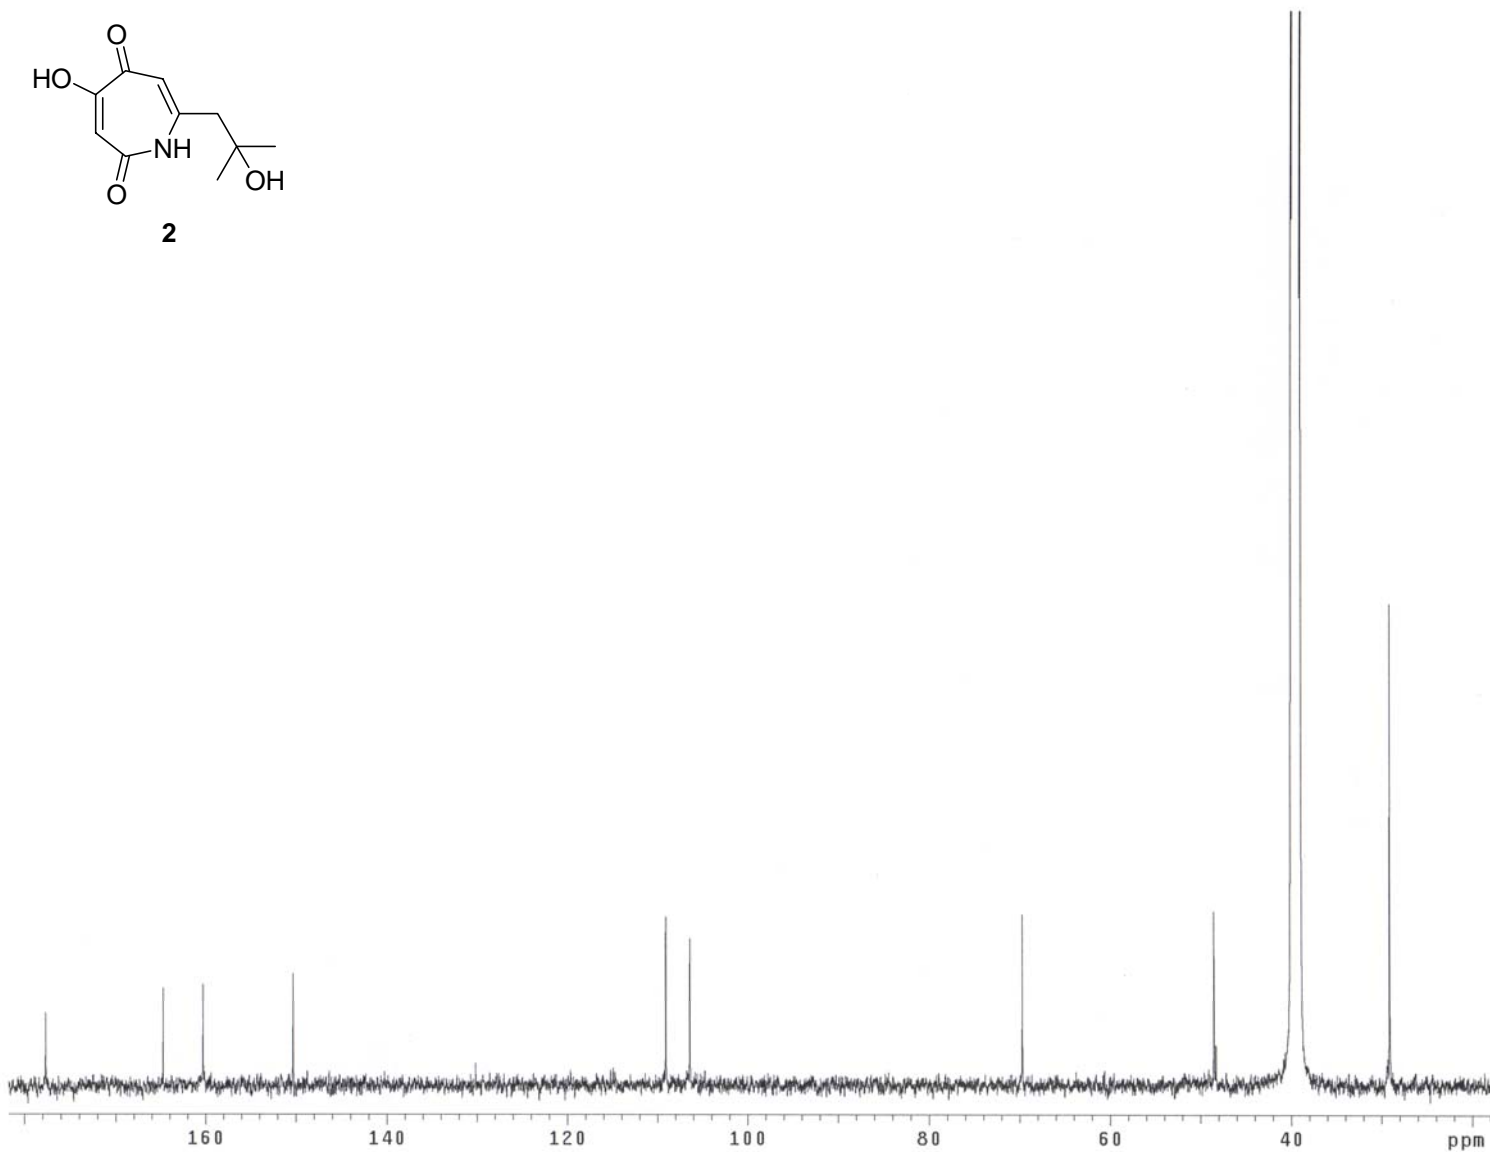

# S6 $^1\text{H}$ NMR spectrum for pestalactam C (**3**) in $\text{DMSO-}d_6$

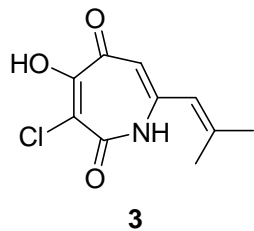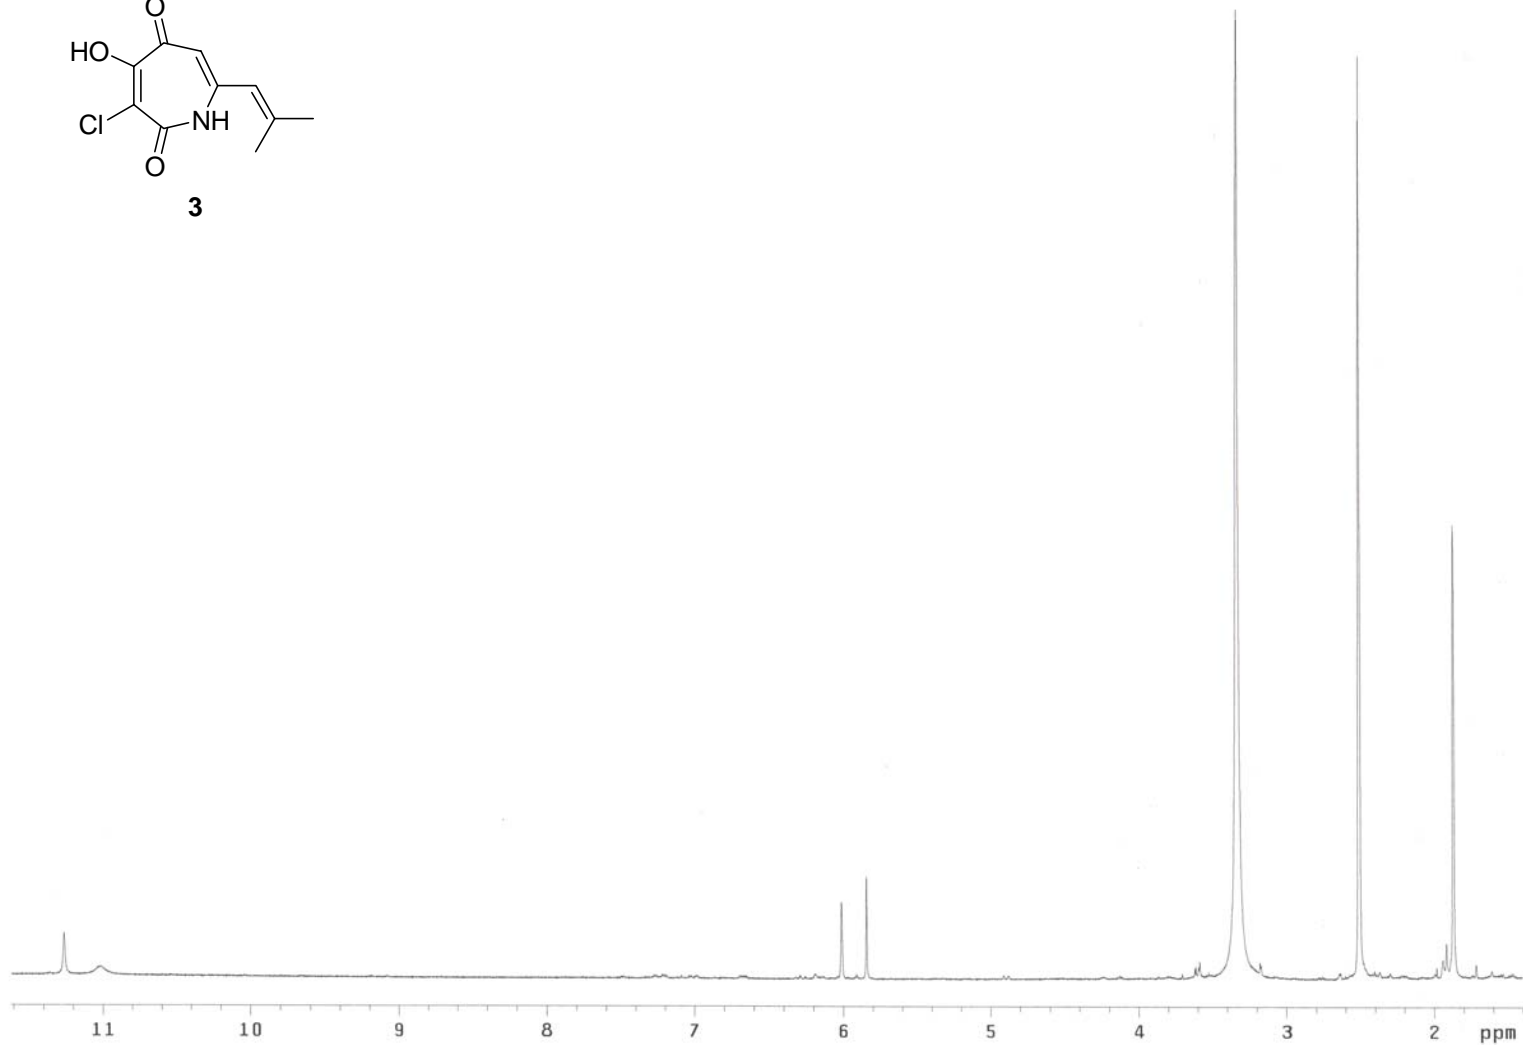

# S7 $^{13}\text{C}$ NMR spectrum for pestalactam C (**3**) in $\text{DMSO-}d_6$

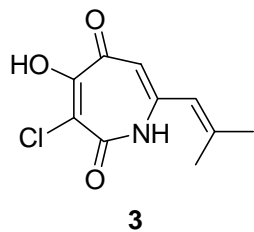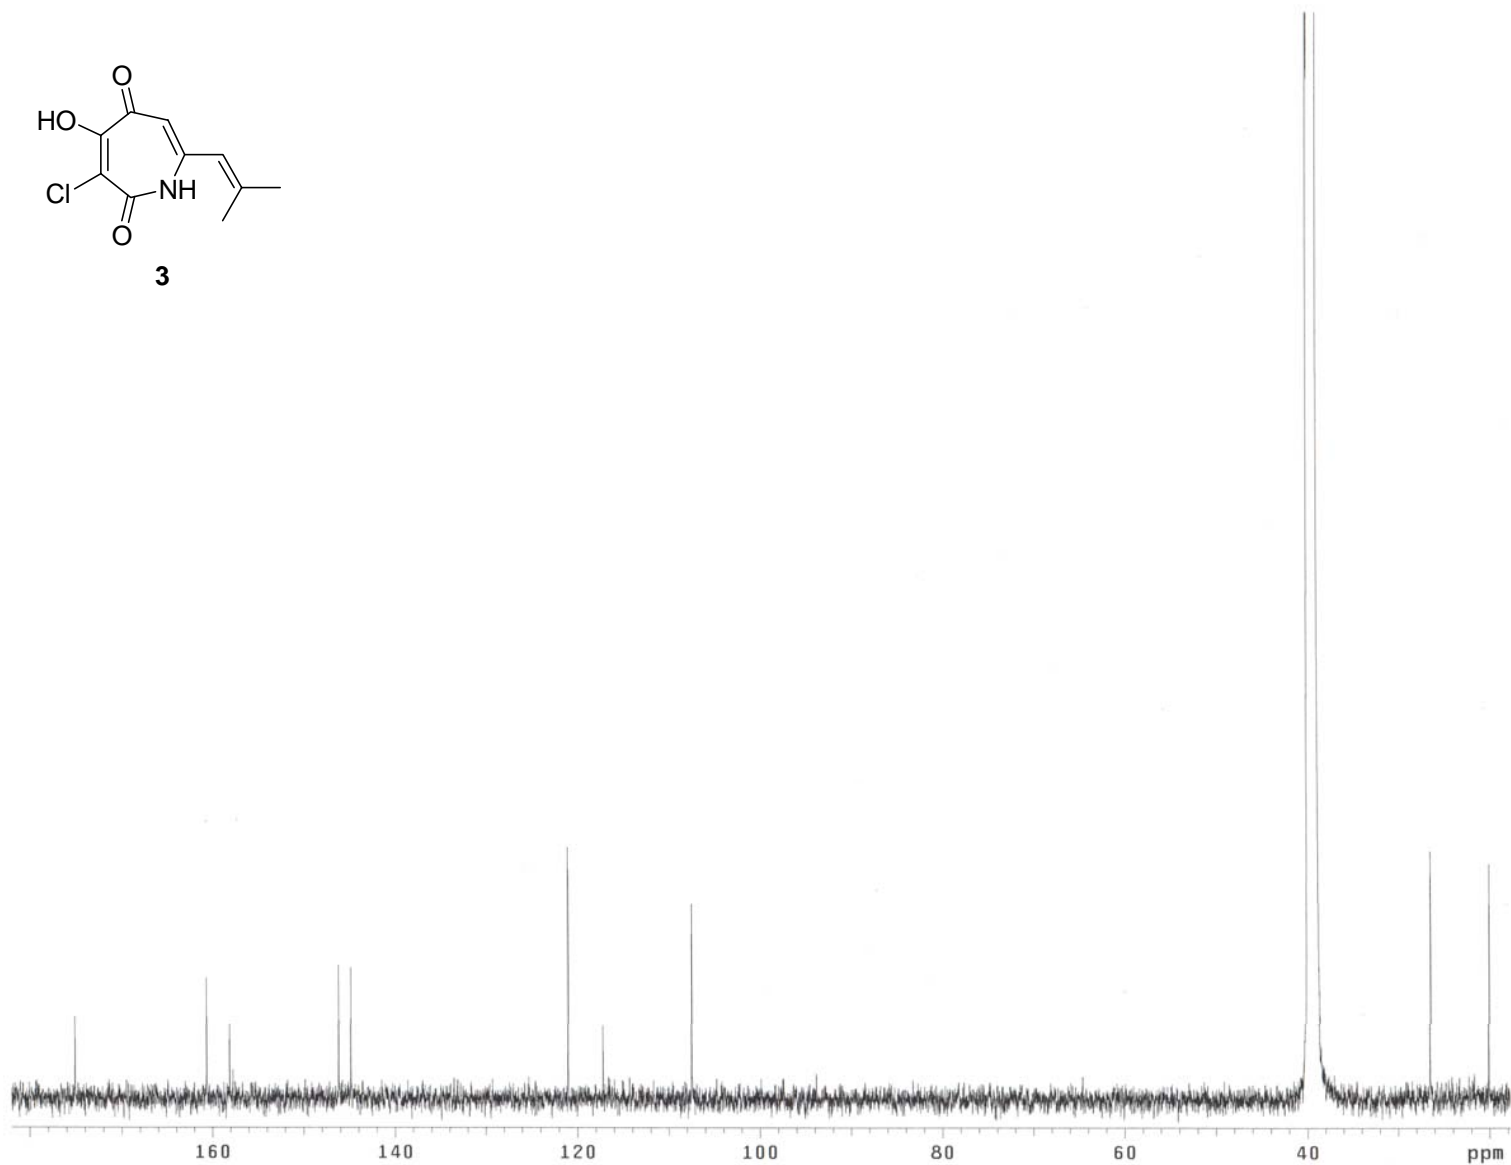

# S8 Hydrogen bonding network in the crystal structure of pestalactam A (1)

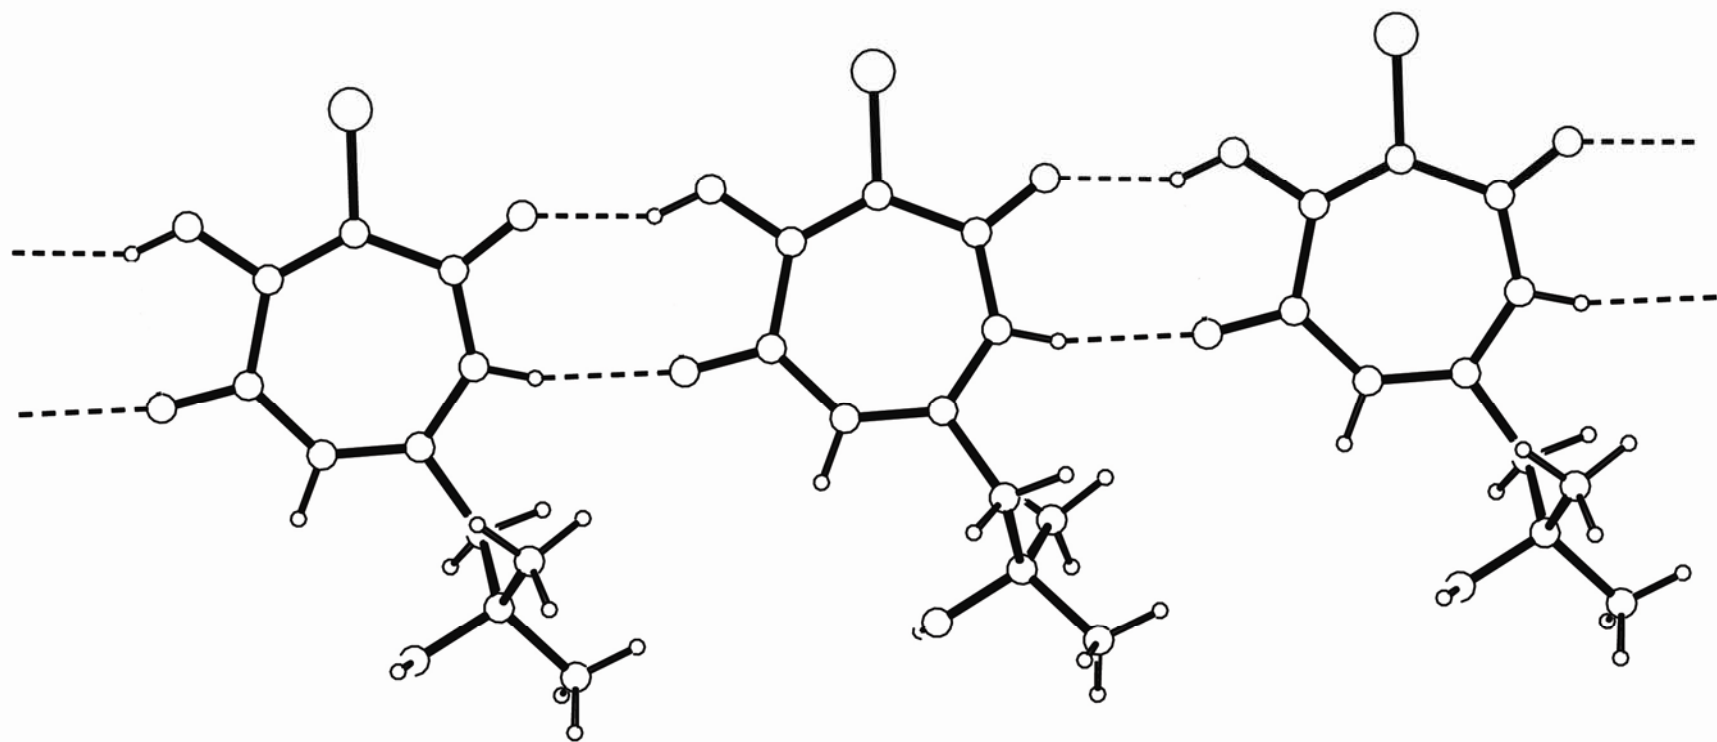

Supplement: b924169h.pdf [file b924169h.pdf]
